# Supplementary figures and images for: Defect engineering in ZnO nanocones for visible photoconductivity and nonlinear absorption
Source: Royal Society of Chemistry journal article supplement (doi:10.1039/c4cp03847a), 2014-10-14

### Supplementary Information

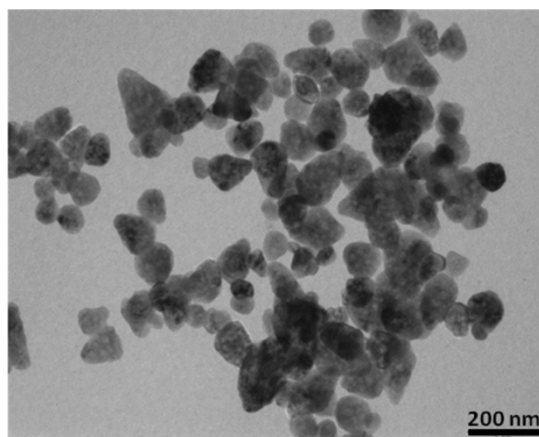

Figure S1. TEM image of ZnO calcined at 550°C

Supplement: c4cp03847a1.pdf [file c4cp03847a1.pdf]
